# Supplementary material for: Auxiliary ligand-induced structural diversities of octacyanometalate-based heterobimetallic coordination polymers towards diverse magnetic properties
Source: Royal Society of Chemistry journal article supplement (doi:10.1039/c9dt00654k), 2019-01-01
Supplement: c9dt00654k1.pdf [file c9dt00654k1.pdf]

<Electronic Supplementary Information>

Auxiliary ligand-induced structural diversities of  
octacyanometalates-based coordination polymers towards diverse  
magnetic properties

Jun Qian,<sup>a,b</sup> Hirofumi Yoshikawa,<sup>c</sup> Jingchun Hu,<sup>a</sup> Mark G. Humphrey,<sup>a,d</sup> Jinfang  
Zhang,<sup>a</sup> Kunio Awaga,<sup>c</sup> and Chi Zhang<sup>\*a,b</sup>

<sup>a</sup> *China-Australia Joint Research Center for Functional Molecular Materials, School of Chemistry and  
Chemical Engineering, Jiangsu University, Zhenjiang 212013, P. R. China*

<sup>b</sup> *China-Australia Joint Research Center for Functional Molecular Materials, School of Chemical  
Science and Engineering, Tongji University, Shanghai 200092, P. R. China*

<sup>c</sup> *Research Center for Materials Science, Department of Chemistry, Graduate School of Science,  
Nagoya University, Furo-cho, Chikusa-ku, Nagoya 464-8602, Japan*

<sup>d</sup> *Research School of Chemistry, Australian National University, Canberra, ACT 2601,  
Australia*

Corresponding Author

\*Prof. Dr. Chi Zhang: E-mail: [chizhang@ujs.edu.cn](mailto:chizhang@ujs.edu.cn); Fax: +86-511-88797815.

## Supplementary Index

|                                                                  |     |
|------------------------------------------------------------------|-----|
| Selected bond lengths (Å) and angles (°) of CPs 1, 2 and 3 ..... | S3  |
| Fig. S1 (IR spectrum of CP-1) .....                              | S4  |
| Fig. S2 (IR spectrum of CP-2) .....                              | S5  |
| Fig. S3 (IR spectrum of CP-3) .....                              | S6  |
| Fig. S4 (Powder XRD of CP-3) .....                               | S7  |
| Fig. S5 ( <i>ORTEP</i> diagram of CP-1) .....                    | S8  |
| Fig. S6 (TGA curve of CP-1).....                                 | S9  |
| Fig. S7 (topological structure of CP-1) .....                    | S10 |
| Fig. S8 (TGA curve of CP-3).....                                 | S11 |
| Fig. S9 (topological structure of CP-3) .....                    | S12 |
| Fig. S10 ( <i>ORTEP</i> diagram of CP-2) .....                   | S13 |

Table S1. Selected Bond Lengths (Å) and Angles (°) of CPs 1, 2, and 3.

| CP-1               |          | CP-2                |          | CP-3                |           |
|--------------------|----------|---------------------|----------|---------------------|-----------|
| W(1)–C(1)#1        | 2.164(4) | Mo(1)–C(1)#1        | 2.146(5) | W(1)–C(1)           | 2.037(7)  |
| W(1)–C(2)#3        | 2.153(4) | Mo(1)–C(2)#2        | 2.157(5) | W(1)–C(1)#1         | 2.037(7)  |
| Co(1)–O(2)#4       | 2.126(3) | Co(1)–O(1)#4        | 2.126(3) | W(1)–C(2)#2         | 2.099(7)  |
| Co(1)–O(3)#4       | 2.072(3) | Co(1)–O(2)#4        | 2.073(3) | W(1)–C(2)#3         | 2.099(7)  |
| Co(1)–N(2)         | 2.074(4) | Co(1)–N(1)          | 2.068(4) | Co(1)–N(1)#4        | 2.116(8)  |
| Cl(1)–O(1)#5       | 1.411(6) | Cl(1)–O(3)#5        | 1.436(6) | Co(1)–N(3)          | 1.905(6)  |
| Cl(1)–O(1)#6       | 1.411(6) | Cl(1)–O(3)#6        | 1.436(6) | Co(1)–N(3)#5        | 1.905(6)  |
| Cl(1)–O(1)#7       | 1.411(6) | Cl(1)–O(3)#7        | 1.436(6) | N(4)–N(4)#6         | 1.252(6)  |
|                    |          |                     |          |                     |           |
| N(1)–C(1)–W(1)     | 178.7(4) | N(1)–C(1)–Mo(1)     | 176.4(4) | C(1)–W(1)–C(1)#2    | 97.07(1)  |
| N(2)–C(2)–W(1)     | 176.9(4) | N(2)–C(2)–Mo(1)     | 178.6(4) | C(1)–W(1)–C(2)      | 74.02(2)  |
| C(2)–N(2)–Co(1)    | 160.5(4) | C(1)–N(1)–Co(1)     | 160.6(4) | C(1)#2–W(1)–C(2)    | 148.9(3)  |
| C(1)#2–W(1)–C(2)#1 | 75.8(2)  | C(1)–Mo(1)–C(2)#3   | 142.2(2) | C(1)#3–W(1)–C(2)    | 72.2(3)   |
| C(1)#1–W(1)–C(2)   | 142.3(2) | C(1)#1–Mo(1)–C(2)   | 75.5(2)  | C(2)–W(1)–C(2)#2    | 128.0(2)  |
| C(1)#2–W(1)–C(2)   | 71.7(2)  | C(1)#1–Mo(1)–C(2)#3 | 71.5(2)  | C(2)#2–W(1)–C(2)#3  | 76.6(4)   |
| C(2)#1–W(1)–C(2)   | 131.8(1) | C(2)#3–Mo(1)–C(2)   | 94.8(7)  | N(3)–Co(1)–N(3)#5   | 83.8(4)   |
| C(2)–W(1)–C(2)#3   | 70.6(2)  | C(2)–Mo(1)–C(2)#1   | 146.3(2) | N(3)–Co(1)–N(1)#4   | 94.3(2)   |
| O(3)#4–Co(1)–N(2)  | 90.5(1)  | O(2)#4–Co(1)–N(1)   | 90.3(2)  | N(1)#4–Co(1)–N(1)   | 160.92(1) |
| O(3)–Co(1)–N(2)    | 89.5(1)  | O(2)–Co(1)–O(1)#4   | 87.8(1)  | N(3)#5–Co(1)–N(1)#4 | 99.9(2)   |

Symmetry transformations used to generate equivalent atoms of CP-1:

#1  $-y-3/4, x+1/4, -z+1/4$  #2  $y-1/4, -x-3/4, -z+1/4$  #3  $-x-1, -y-1/2, z+0$  #4  $-x-1, -y-1, -z$  #5  $y-1/4, -x-7/4, -z+1/4$  #6  $-x-2, -y-3/2, z+0$  #7  $-y-7/4, x+1/4, -z+1/4$

Symmetry transformations used to generate equivalent atoms of CP-2:

#1  $-x-1, -y-1/2, z+0$  #2  $-y-3/4, x+1/4, -z+1/4$  #3  $y-1/4, -x-3/4, -z+1/4$  #4  $-x-3/2, -y-1/2, -z+1/2$  #5  $y-1/4, -x-7/4, -z+1/4$  #6  $-y-7/4, x+1/4, -z+1/4$  #7  $-x-2, -y-3/2, z+0$

Symmetry transformations used to generate equivalent atoms of CP-3:

#1  $-x+0, -y+1/2, z+0$  #2  $y-1/4, -x+1/4, -z+3/4$  #3  $-y+1/4, x+1/4, -z+3/4$  #4  $-x, -y, -z+1$  #5  $x, -y, -z+1$  #6  $-y+1/4, -x+1/4, -z+7/4$

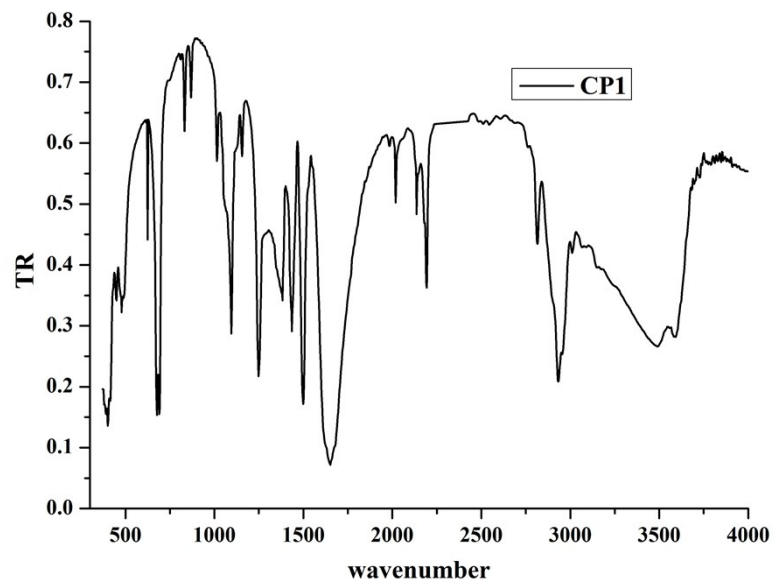

Fig. S1 IR spectrum of CP-1.

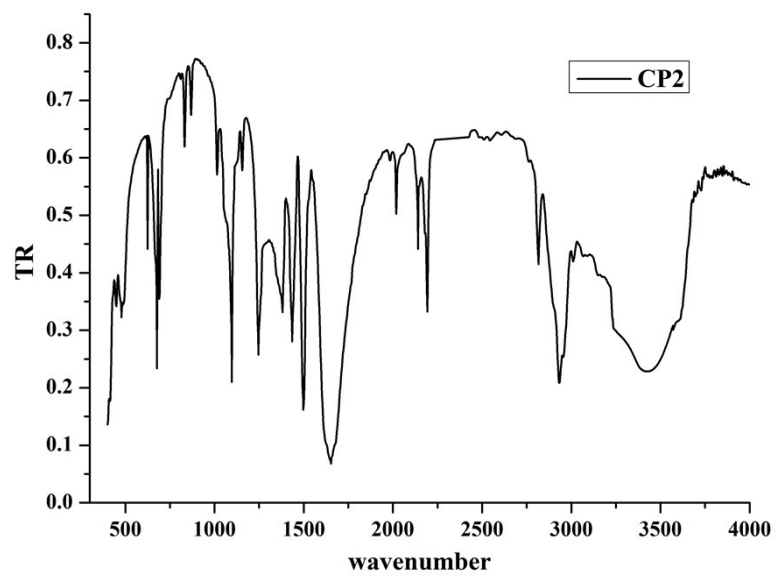

Fig. S2 IR spectrum of CP-2.

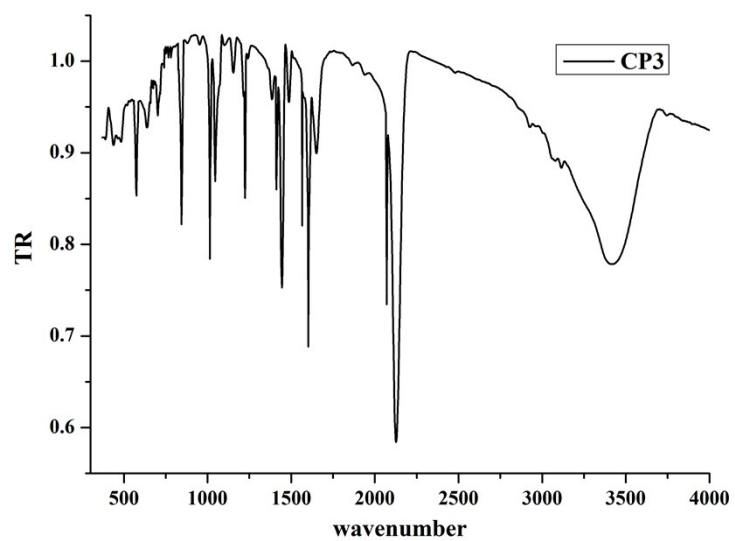

Fig. S3 IR spectrum of CP-3.

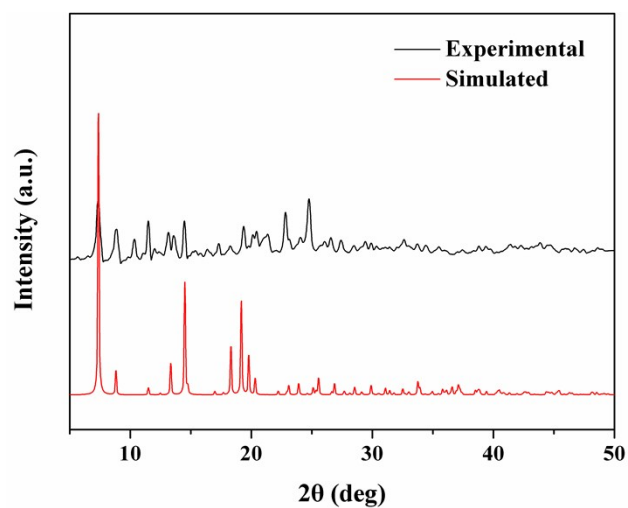

Fig. S4 The experimental powder X-ray diffraction pattern (wavelength  $\lambda = 1.5406 \text{ \AA}$ ) of CP-3. The simulated diffraction pattern generated from the single-crystal X-ray diffraction data is given for comparison.

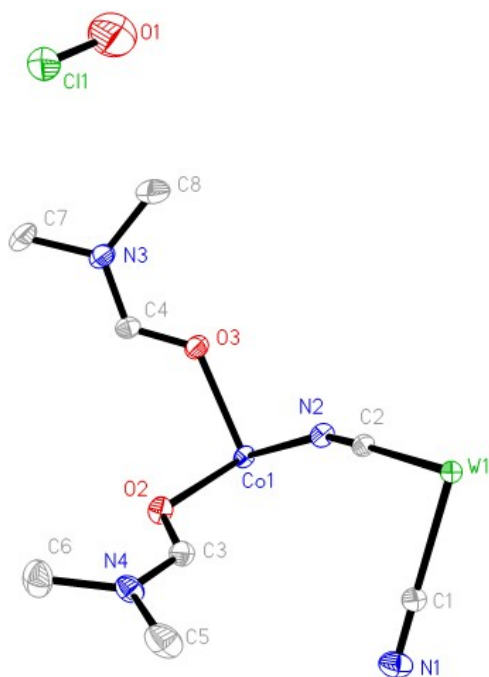

Fig. S5 *ORTEP* diagram of CP-1 with displacement ellipsoids of 30% probability level. Hydrogen atoms were omitted for clarity.



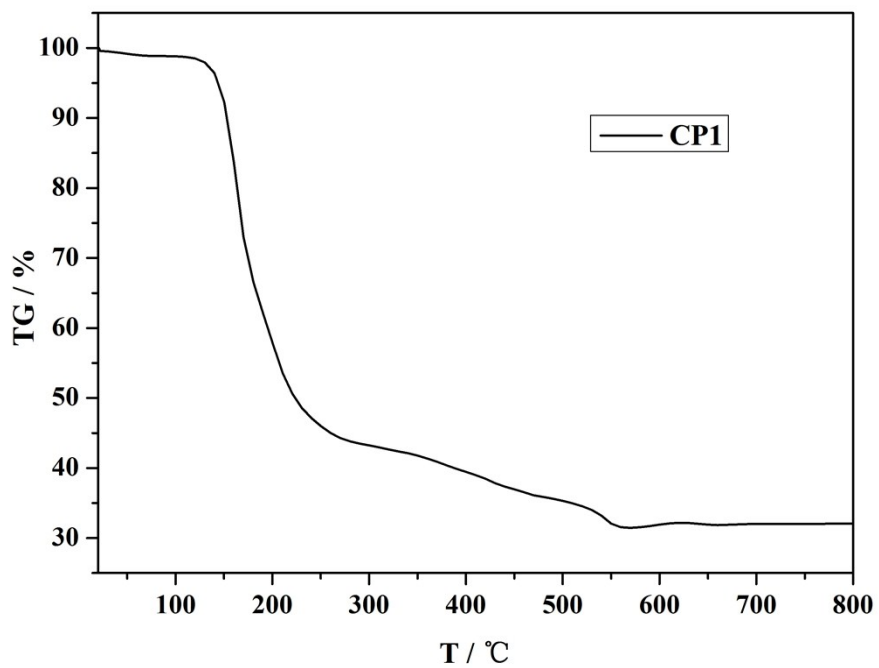

Fig. S6 TGA curve of CP-1.

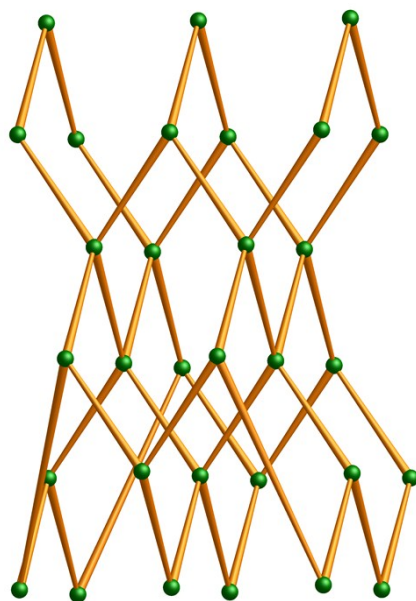

Fig. S7 The topological structure of CP-1.

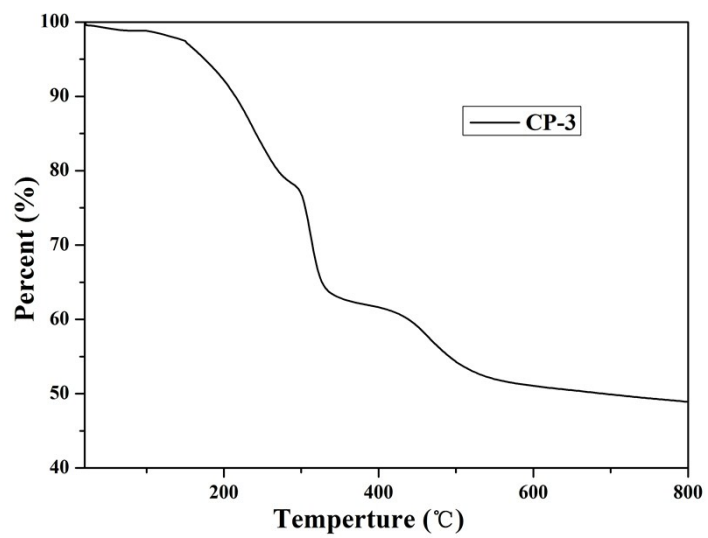

Fig. S8 TGA curve of CP-3.

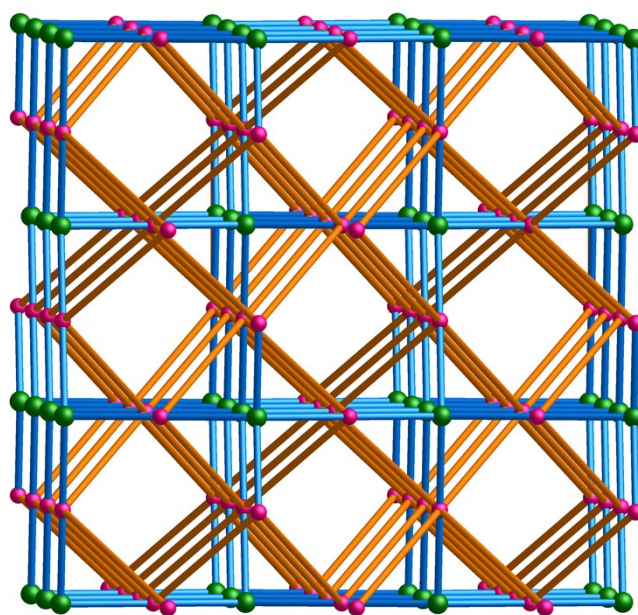

Fig. S9 Topological structure of CP-3.

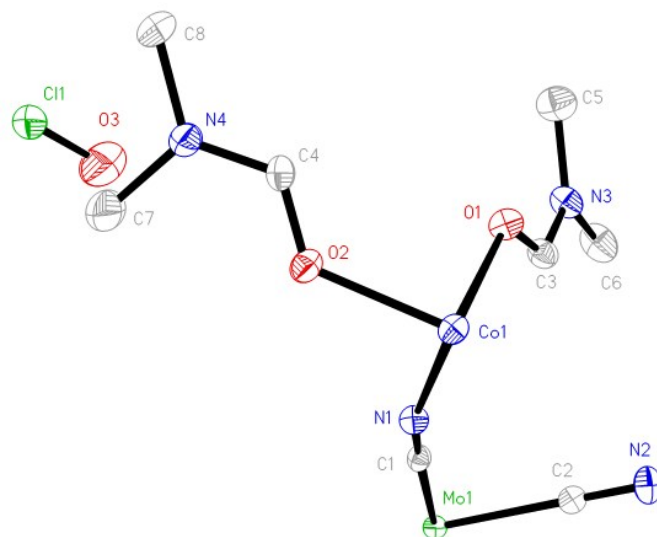

Fig. S10 *ORTEP* diagram of CP-2 with displacement ellipsoids of 30% probability level. Hydrogen atoms were omitted for clarity.
